# Supplementary material for: Attitudes of Swiss psychiatrists towards cannabis regulation and medical use in psychiatry: a cross-sectional study
Source: Springer Nature journal article supplement (doi:10.1186/s42238-023-00210-y), 2023-12-06
Supplement: MOESM2 [file 42238_2023_210_MOESM2_ESM.pdf]

| <b>Survey chapter</b>                                                                        | <b>Questions</b> |
|----------------------------------------------------------------------------------------------|------------------|
| Demographic data                                                                             | 1-10             |
| Fictive case report A (Cannabis, CBD and THC for therapy in mental disorders)                | 11-13            |
| Reservations in general about cannabis for medical purposes in mental disorders              | 14               |
| Personal attitudes towards cannabis for medical purposes in mental disorders                 | 15               |
| Prevalence estimation and experience with cannabis for medical purposes in mental disorders. | 16               |
| Fictive case report B (low-risk non-medical cannabis use)                                    | 17-20            |
| Personal attitudes towards legal aspects concerning cannabis for non-medical purposes        | 21-25            |
| Personal attitudes towards health effects of cannabis and tobacco use                        | 26-31            |
