# Supplementary material for: Attitudes of Swiss psychiatrists towards cannabis regulation and medical use in psychiatry: a cross-sectional study
Source: Springer Nature journal article supplement (doi:10.1186/s42238-023-00210-y), 2023-12-06
Supplement: MOESM3 [file 42238_2023_210_MOESM3_ESM.pdf]

|                                   | <b>n (%)</b><br><b>German-speaking</b><br><b>cantons*</b> | <b>n (%)</b><br><b>French-speaking</b><br><b>cantons*</b> | <b>n (%)</b><br><b>full responders</b> | <b>n (%)</b><br><b>partial responders</b> |
|-----------------------------------|-----------------------------------------------------------|-----------------------------------------------------------|----------------------------------------|-------------------------------------------|
| <b>Age</b>                        | <b>n=181</b>                                              | <b>n=42</b>                                               | <b>n=97</b>                            | <b>n=151</b>                              |
| <30 years                         | 11 (6.1)                                                  | 2 (4.8)                                                   | 8 (8.2)                                | 6 (4.0)                                   |
| 30-40 years                       | 43 (23.8)                                                 | 3 (7.1)                                                   | 24 (24.7)                              | 26 (17.2)                                 |
| 41-50 years                       | 39 (21.5)                                                 | 12 (28.6)                                                 | 24 (24.7)                              | 33 (21.8)                                 |
| 51-60 years                       | 50 (27.6)                                                 | 13 (30.9)                                                 | 20 (20.6)                              | 47 (31.1)                                 |
| >60 years                         | 36 (19.9)                                                 | 11 (26.2)                                                 | 20 (20.6)                              | 37 (24.5)                                 |
| Not specified                     | 2 (1.1)                                                   | 1 (2.4)                                                   | 1 (1.0)                                | 2 (1.3)                                   |
| <b>Sex</b>                        | <b>n=184</b>                                              | <b>n=42</b>                                               | <b>n=97</b>                            | <b>n=154</b>                              |
| Women                             | 71 (38.6)                                                 | 11 (50.0)                                                 | 37 (38.1)                              | 65 (42.2)                                 |
| Men                               | 109 (59.2)                                                | 20 (47.6)                                                 | 57 (58.8)                              | 85 (55.2)                                 |
| Other definition                  | 3 (1.6)                                                   | 0 (0.0)                                                   | 3 (3.1)                                | 0 (0.0)                                   |
| Not specified                     | 1 (0.5)                                                   | 1 (2.4)                                                   | 0 (0.0)                                | 4 (2.6)                                   |
| <b>Board certified</b>            | <b>n=184</b>                                              | <b>n=41</b>                                               | <b>n=97</b>                            | <b>n=154</b>                              |
| <b>Psychiatrist</b>               |                                                           |                                                           |                                        |                                           |
| Yes                               | 125 (67.9)                                                | 38 (92.7)                                                 | 71 (73.2)                              | 114 (74.0)                                |
| No                                | 59 (32.1)                                                 | 3 (7.3)                                                   | 26 (26.8)                              | 40 (26.0)                                 |
| <b>Active years in</b>            | <b>n=184</b>                                              | <b>n=41</b>                                               | <b>n=97</b>                            | <b>n=151</b>                              |
| <b>Psychiatry</b>                 |                                                           |                                                           |                                        |                                           |
| <2 years                          | 15 (8.1)                                                  | 0 (0.0)                                                   | 8 (8.2)                                | 7 (4.64)                                  |
| 2-5 years                         | 16 (8.7)                                                  | 3 (7.3)                                                   | 10 (10.3)                              | 11 (7.3)                                  |
| 5-10 years                        | 29 (15.8)                                                 | 2 (4.9)                                                   | 15 (15.5)                              | 17 (11.3)                                 |
| 11-15 years                       | 27 (14.7)                                                 | 8 (19.5)                                                  | 18 (18.6)                              | 21 (13.9)                                 |
| 16-20 years                       | 23 (12.5)                                                 | 10 (24.4)                                                 | 11 (11.3)                              | 25 (16.6)                                 |
| >20 years                         | 73 (39.7)                                                 | 18 (43.9)                                                 | 35 (36.1)                              | 68 (45.0)                                 |
| Not specified                     | 1 (0.5)                                                   | 0 (0.0)                                                   | 0 (0.0)                                | 2 (1.3)                                   |
| <b>Setting</b>                    | <b>n=181</b>                                              | <b>n=42</b>                                               | <b>n=97</b>                            | <b>n=151</b>                              |
| Own Practice                      |                                                           |                                                           |                                        |                                           |
| Institution, mainly<br>outpatient | 83 (45.9)                                                 | 39 (92.9)                                                 | 48 (49.5)                              | 92 (60.9)                                 |
| Institution, mainly<br>inpatient  | 52 (28.7)                                                 | 1 (2.4)                                                   | 24 (24.7)                              | 31 (20.5)                                 |
| Not specified                     | 44 (24.3)                                                 | 2 (4.8)                                                   | 24 (24.7)                              | 26 (17.2)                                 |
|                                   | 2 (1.1)                                                   | 0 (0.0)                                                   | 1 (1.0)                                | 2 (1.3)                                   |
