# Supplementary material for: Attitudes of Swiss psychiatrists towards cannabis regulation and medical use in psychiatry: a cross-sectional study
Source: Springer Nature journal article supplement (doi:10.1186/s42238-023-00210-y), 2023-12-06

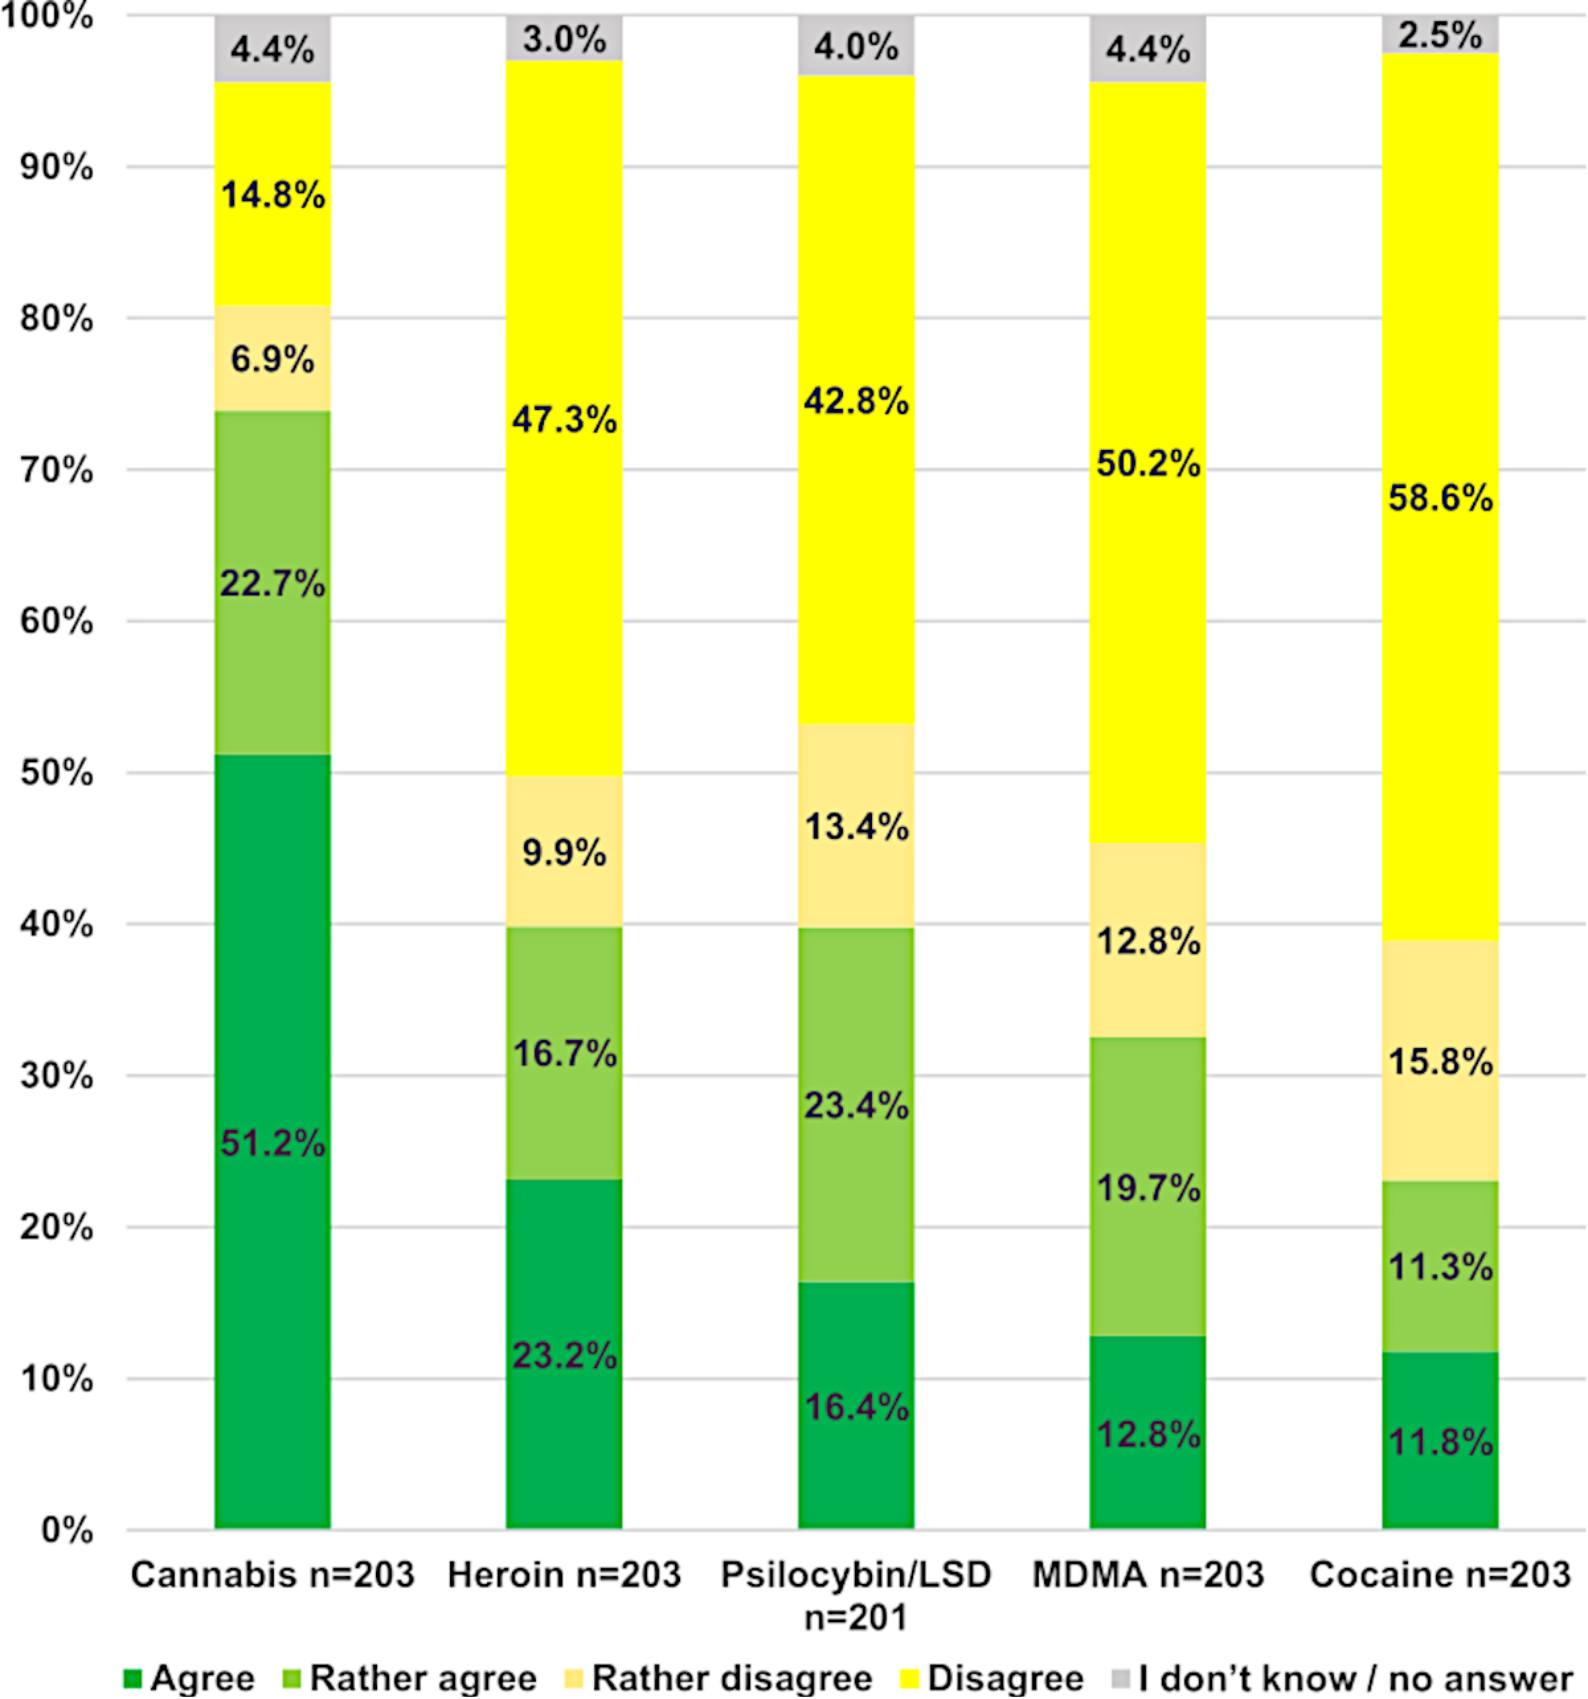

Supplement: MOESM7 [file 42238_2023_210_MOESM7_ESM.pdf]
